# Supplementary material for: Unraveling the regulatory network of miRNA expression in Potato Y virus-infected of Nicotiana benthamiana using integrated small RNA and transcriptome sequencing
Source: Front Genet. 2024 Jan 8;14:1290466. doi: 10.3389/fgene.2023.1290466 (PMC10800900; doi:10.3389/fgene.2023.1290466)
Supplement: Supplementary file 9 [file Table1.XLSX]

## Sheet: Sheet1
Category			RawReads	Repbase	Aligned-Repbase	Rfam	Reads	Aligned-reads
CK-Leaf	repeat1	Total	29.46M	23330843	2186705	115308	23330843	1086501
		Unique	3.15M	3149045	56792	2458	3149045	46595
	repeat2	Total	21.31M	17614398	1610662	96506	17614398	997026
		Unique	2.22M	2224065	48086	1713	2224065	37134
	repeat3	Total	22.81M	19030159	1570080	124877	19030159	824286
		Unique	2.53M	2526546	45851	1763	2526546	29767
CK-stem	repeat1	Total	26.36M	10712741	4027479	99794	10712741	17539
		Unique	1.32M	1322842	68179	2810	1322842	4115
	repeat2	Total	20.66M	17262755	2433524	160878	17262755	74641
		Unique	3.78M	3778909	84729	5543	3778909	15477
	repeat3	Total	22.62M	20174236	2833441	244480	20174236	174099
		Unique	3.89M	3888314	82117	8303	3888314	35272
CK-Root	repeat1	Total	25.15M	16291102	2319140	57785	16291102	200221
		Unique	3M	2995396	54109	7826	2995396	19621
	repeat2	Total	24M	18882224	1876620	51777	18882224	147481
		Unique	3.01M	3008555	59573	11718	3008555	25841
	repeat3	Total	24.44M	19404128	3077677	27198	19404128	300465
		Unique	3.35M	3345437	74378	6651	3345437	27560
PVY-Leaf	repeat1	Total	27.9M	19317596	2765443	35781	19317596	735260
		Unique	2.07M	2071025	59682	2851	2071025	33449
	repeat2	Total	26.85M	23534388	2116702	31870	23534388	712988
		Unique	3.58M	3577890	54632	2092	3577890	37140
	repeat3	Total	20.91M	18307823	1352762	63862	18307823	445528
		Unique	3.59M	3585810	47262	2019	3585810	20718
PVY-Stem	repeat1	Total	25.49M	17128957	7632829	38142	17128957	51181
		Unique	1.74M	1739185	69064	4174	1739185	16315
	repeat2	Total	20.98M	16151501	2004469	58377	16151501	28324
		Unique	3.26M	3260676	77571	12627	3260676	6761
	repeat3	Total	27.54M	21930958	3348012	49731	21930958	88190
		Unique	2.97M	2970687	82309	9754	2970687	12735
PVY-Root	repeat1	Total	27.77M	24380766	2072111	67480	24380766	306994
		Unique	4.14M	4135343	58575	3152	4135343	28343
	repeat2	Total	35.04M	29704625	3406125	85971	29704625	926169
		Unique	4.37M	4367473	75725	3349	4367473	60760
	repeat3	Total	25.47M	21127195	2162736	106539	21127195	117312
		Unique	3.49M	3486634	60882	4251	3486634	14873
